# Supplementary material for: Dysbiotic Gut Bacteria in Obesity: An Overview of the Metabolic Mechanisms and Therapeutic Perspectives of Next-Generation Probiotics
Source: MDPI journal article supplement (doi:10.3390/microorganisms10020452), 2022-02-16
Supplement: s1 [file s1]

Table S1: Traditional probiotics efficacy to the care of obesity in animal and human clinical trials (not exhaustive).

|                        | Single Strain or Consortium | Composition                                                                                                                                                                                                                                                                                   | Weight gain | Pre-clinical evidence |                  |              |                                                  | Clinical evidence |             |                  |              |                                       | References                                                                 |
|------------------------|-----------------------------|-----------------------------------------------------------------------------------------------------------------------------------------------------------------------------------------------------------------------------------------------------------------------------------------------|-------------|-----------------------|------------------|--------------|--------------------------------------------------|-------------------|-------------|------------------|--------------|---------------------------------------|----------------------------------------------------------------------------|
|                        |                             |                                                                                                                                                                                                                                                                                               |             | Food Intake           | Fat accumulation | Inflammation | comorbidity                                      | Body weight       | Food Intake | Fat accumulation | Inflammation | comorbidity                           |                                                                            |
| Traditional probiotics | Single strain               | <i>Lactobacillus gasseri</i> BNR17                                                                                                                                                                                                                                                            | ↓**         |                       | ↓                |              | ↓ insulin<br>↓ leptin                            | ↓**               |             | ↓                |              | ↓ waist circumference                 | Kim et al. (2018)<br>Kang, J. H et al (2013)<br>SP Jung et al (2013)       |
|                        | Single strain               | <i>Bifidobacterium breve</i> B-3                                                                                                                                                                                                                                                              | ↓           |                       | ↓                |              | ↓insulin<br>↓ fasting glucose<br>↓ cholesterol   |                   |             | ↓                |              |                                       | S Kondo et al (2010)                                                       |
|                        | Single strain               | <i>Bifidobacterium animalis</i> subsp. <i>Lactis</i> CECT 8145                                                                                                                                                                                                                                | ↓           | ↓                     | ↓                |              | ↓ plasma ghrelin levels<br>↑ insulin sensitivity | ↓                 |             | ↓                |              | ↓ waist circumference                 | NL Carreras et al (2018)<br>Pedret et al. (2018)<br>Cerdó, T. et al (2019) |
|                        | Single strain               | <i>B. pseudocatenulatum</i> CECT 7765                                                                                                                                                                                                                                                         |             |                       |                  |              |                                                  | ↓                 |             |                  |              |                                       | Cerdó, (2019).                                                             |
|                        | Single strain               | <i>L. rhamnosus</i> CGMCC1.3724                                                                                                                                                                                                                                                               |             |                       |                  |              |                                                  | ↓                 |             |                  |              |                                       | Sánchez et al. (2017) Cerdó, T. et al (2019)                               |
|                        | Single strain               | <i>B. pseudocatenulatum</i> CECT 7765                                                                                                                                                                                                                                                         |             |                       |                  |              |                                                  | ↓                 |             |                  |              |                                       | Sanchis-Chordá et al. (2018)<br>Cerdó, T. et al (2019)                     |
|                        | Consortium                  | probiotic mixture including nine different strains of <i>Lactobacillus</i> and <i>Bifidobacterium</i>                                                                                                                                                                                         |             |                       |                  |              |                                                  | ↓                 |             | ↓                |              |                                       | Szulinska et al. (2018)<br>Cerdó, T. et al (2019)                          |
|                        | Consortium                  | <i>L. acidophilus</i> LA140, <i>L. casei</i> LC107, <i>B. bifidum</i> BBL730 and isoflavones                                                                                                                                                                                                  | ↓           |                       | ↓                |              |                                                  | ↓                 |             |                  |              |                                       | Cerdó, (2019).                                                             |
|                        | Consortium                  | VSL#3 ( <i>Streptococcus thermophilus</i> DSM24731, <i>L. acidophilus</i> DSM24735, <i>L. delbrueckii</i> subsp. <i>Bulgaricus</i> DSM24724, <i>L. paracasei</i> DSM24733, <i>L. plantarum</i> DSM24730, <i>B. longum</i> DSM24736, <i>B. infantis</i> DSM24737, and <i>B. breve</i> DSM2473) |             |                       |                  |              |                                                  | ↓                 |             | ↓                |              | ↓ insulin resistance<br>↑ GLP-1 level | Alisi et al. (2014)<br>Osterberg et al. (2015)<br>Cerdó, T. et al (2019)   |
|                        | Consortium                  | <i>L. acidophilus</i> ATCC B3208, <i>L. rhamnosus</i> DSMZ 21690, <i>B. lactis</i> DSMZ 32,296, and <i>B. bifidum</i> ATCC SD6576                                                                                                                                                             |             |                       |                  |              |                                                  | =                 |             |                  |              | ↓ insulin resistance<br>↑ GLP-1 level | Cerdó, (2019)                                                              |
|                        | Consortium                  | <i>L. curvatus</i> HY7601 + <i>L. plantarum</i> KY1032                                                                                                                                                                                                                                        |             |                       |                  |              |                                                  | ↓                 |             | ↓                |              | ↓ waist circumference                 | Jung et al. (2015)<br>Cerdó, T. et al (2019)                               |
|                        | Consortium                  | <i>L. acidophilus</i> LA-14, <i>L. casei</i> LC-11, <i>Lactococcus lactis</i> LL-23, <i>B. bifidum</i> BB-06, <i>B. lactis</i> BL-4                                                                                                                                                           |             |                       |                  |              |                                                  | =                 |             |                  |              | ↓ waist circumference                 | Gomes et al. (2017)<br>Cerdó, T. et al (2019)                              |
|                        | Consortium                  | <i>L. curvatus</i> HY7601 + <i>L. plantarum</i> KY1032                                                                                                                                                                                                                                        |             |                       |                  |              |                                                  | ↓                 |             | ↓                |              |                                       | Cerdó, (2019).                                                             |

\*\* Trend.
